# Supplementary material for: Infections, antibiotic treatment and mortality in patients admitted to ICUs in countries considered to have high levels of antibiotic resistance compared to those with low levels
Source: PubMed Central journal article supplement (PMC4181425; doi:10.1186/1471-2334-14-513), 2014-09-22
Supplement: 12879_2014_3832_MOESM1_ESM.pdf [file 12879_2014_3832_MOESM1_ESM.pdf]

# Infections, antibiotic treatment and mortality in patients admitted to ICUs in countries considered to have high levels of antibiotic resistance compared to those with low levels

Håkan Hanberger<sup>1</sup>, Massimo Antonelli<sup>2</sup>, Martin Holmbom<sup>1</sup>, Jeffrey Lipman<sup>3</sup>, Peter Pickkers<sup>4</sup>, Marc Leone<sup>5</sup>, Jordi Rello<sup>6</sup>, Yasser Sakr<sup>7</sup>, Sten M Walther<sup>8</sup>, Philippe Vanhems<sup>9</sup>, Jean-Louis Vincent<sup>10</sup>  
for the EPIC II Group of Investigators

## Additional file 1: Sites of infection

| Site/source of infection, n (%) | Patients from lowABR countries (n=255) | Patients from highABR countries (n=1187) | p-value |
|---------------------------------|----------------------------------------|------------------------------------------|---------|
| Respiratory                     | 154 (60.4)                             | 761 (64.1)                               | 0.263   |
| Abdominal                       | 62 (24.3)                              | 218 (18.4)                               | 0.029   |
| Blood                           | 41 (16.1)                              | 233 (19.6)                               | 0.029   |
| Renal / Urinary                 | 22 (8.6)                               | 148 (12.5)                               | 0.190   |
| Skin                            | 15 (5.9)                               | 67 (5.6)                                 | 0.084   |
| Catheter                        | 12 (4.7)                               | 76 (6.4)                                 | 0.882   |
| CNS                             | 4 (1.6)                                | 35 (2.9)                                 | 0.304   |
| Other                           | 32 (12.5)                              | 65 (5.5)                                 | <0.001  |

Patients could have more than one site of infection. CNS, central nervous system.
