# Supplementary material for: Infections, antibiotic treatment and mortality in patients admitted to ICUs in countries considered to have high levels of antibiotic resistance compared to those with low levels
Source: PubMed Central journal article supplement (PMC4181425; doi:10.1186/1471-2334-14-513), 2014-09-22
Supplement: 12879_2014_3832_MOESM2_ESM.pdf [file 12879_2014_3832_MOESM2_ESM.pdf]

## Additional file 2: Use of antimicrobials as prophylaxis in all patients

|                                               | LowABR ICU patients<br>(n=183) | HighABR ICU patients<br>(n=489) | P value |
|-----------------------------------------------|--------------------------------|---------------------------------|---------|
| <b>Antimicrobial, n (%)</b>                   |                                |                                 |         |
| Cephalosporins (all)                          | 127 (22.8)                     | 301 (13.7)                      | <0.001  |
| <i>Cefazolin</i>                              | 55 (9.9)                       | 158 (7.2)                       | 0.034   |
| <i>Cefuroxime</i>                             | 44 (7.9)                       | 37 (1.7)                        | <0.001  |
| <i>Ceftazidime</i>                            | 3 (0.5)                        | 20 (0.9)                        | 0.390   |
| <i>Cefepime/Cefpirome</i>                     | 0 (0)                          | 1 (0)                           | 0.615   |
| <i>Other cephalosporins</i>                   | 26 (4.7)                       | 85 (3.9)                        | 0.388   |
| <b>Penicillins (all)</b>                      | 41 (7.3)                       | 205 (9.3)                       | 0.148   |
| <i>Benzylpenicillin</i>                       | 2 (0.4)                        | 1 (0)                           | 0.045   |
| <i>Ampicillin</i>                             | 1 (0.2)                        | 39 (1.8)                        | 0.005   |
| <i>Amoxicillin+Clavulanate</i>                | 4 (0.7)                        | 86 (3.9)                        | <0.001  |
| <i>Piperacillin+Tazobactam</i>                | 5 (0.9)                        | 72 (3.3)                        | 0.002   |
| <i>Oxa-/Cloca-/Flucloxacillin</i>             | 27 (4.8)                       | 1 (0)                           | <0.001  |
| <i>Unspecified penicillins</i>                | 2 (0.4)                        | 8 (0.4)                         | 0.987   |
| <i>Temocillin</i>                             | 0 (0)                          | 0 (0)                           | 0.000   |
| <b>Other <math>\beta</math>-lactams (all)</b> | 4 (0.7)                        | 53 (2.4)                        | 0.012   |
| <i>Imipenem/Meropenem</i>                     | 4 (0.7)                        | 50 (2.3)                        | 0.018   |
| <i>Aztreonam</i>                              | 0 (0)                          | 1 (0)                           | 0.615   |
| <i>Unspecified <math>\beta</math>-lactams</i> | 0(0)                           | 2 (0.1)                         | 0.477   |
| <b>Aminoglycosides (all)</b>                  | 76 (13.6)                      | 43 (2)                          | <0.001  |
| <i>Amikacin</i>                               | 1 (0.2)                        | 9 (0.4)                         | 0.421   |
| <i>Tobramycin</i>                             | 64 (11.5)                      | 17 (0.8)                        | <0.001  |
| <i>Other aminoglycosides</i>                  | 25 (4.5)                       | 17 (0.8)                        | <0.001  |
| <b>Quinolones (all)</b>                       | 3 (0.5)                        | 53 (2.4)                        | 0.005   |
| <i>Ciprofloxacin</i>                          | 2 (0.4)                        | 22 (1)                          | 0.146   |
| <i>Other quinolones</i>                       | 1 (0.2)                        | 31 (1.4)                        | 0.016   |
| <b>Glycopeptides (all)</b>                    | 2 (0.4)                        | 65 (2.9)                        | <0.001  |
| <i>Vancomycin</i>                             | 2 (0.4)                        | 38 (1.7)                        | 0.016   |
| <i>Other glycopeptides</i>                    | 0 (0)                          | 27 (1.2)                        | 0.009   |
| <b>Macrolides (all)</b>                       | 4 (0.7)                        | 6 (0.3)                         | 0.118   |
| <i>Erythromycin</i>                           | 3 (0.5)                        | 1 (0)                           | 0.006   |
| <i>Other macrolides</i>                       | 1 (0.2)                        | 5 (0.2)                         | 0.829   |
| <b>Other antibiotics (all)</b>                | 92 (16.5)                      | 92 (4.2)                        | <0.001  |
| <i>Metronidazole</i>                          | 23 (4.1)                       | 51 (2.3)                        | 0.018   |
| <i>Cotrimoxazole</i>                          | 4 (0.7)                        | 13 (0.6)                        | 0.732   |
| <i>Oxazolidinone</i>                          | 0 (0)                          | 7 (0.3)                         | 0.183   |
| <i>Unspecified antibiotics</i>                | 66 (11.8)                      | 24 (1.1)                        | <0.001  |
| <b>Antifungals (all)</b>                      | 74 (13.3)                      | 57 (2.6)                        | <0.001  |
| <i>Fluconazole</i>                            | 5 (0.9)                        | 33 (1.5)                        | 0.276   |
| <i>Amphotericin B</i>                         | 63 (11.3)                      | 13 (0.6)                        | <0.001  |
| <i>Amphotericin Lipid Complex</i>             | 2 (0.4)                        | 2 (0.1)                         | 0.137   |
| <i>Caspofungin</i>                            | 2 (0.4)                        | 7 (0.3)                         | 0.880   |
| <i>voriconazole</i>                           | 0 (0)                          | 1 (0)                           | 0.615   |

|                          |         |         |       |
|--------------------------|---------|---------|-------|
| <i>Other antifungals</i> | 2 (0.4) | 2 (0.1) | 0.137 |
| <b>Antiviral (all)</b>   | 3 (0.5) | 7 (0.3) | 0.440 |
